# Supplementary material
Source: publisher site journal article supplement (https://static.cambridge.org/content/id/urn:cambridge.org:id:article:S1041610220000319/resource/name/S1041610220000319supp001.docx)
Supplement: Supplementary file 1 [file S1041610220000319supp001.docx]

Supplemental Table 1. ANOVA Analysis Between Evaluation Seekers and Volunteers with Sex, Age, and Education as Covariates

|  | F (df) | *p* | *Partial η*2 |
| --- | --- | --- | --- |
| Neuropsychological tests |  |  |  |
| MMSE | .78 (1,106) | .47 | .01 |
| Modified R-O Recall | 3.99 (1,104) | .05 | .04 |
| Trail Making Test B | .06 (1,106) | .80 | .00 |
| Digit Symbol | 2.16 (1,106) | .15 | .02 |
| Animal fluency | .30 (1,106) | .59 | .00 |
| Letter fluency | .49 (1,106) | .49 | .01 |
| Depression |  |  |  |
| GDS | 29.72 (1,100) | <.001 | .23 |
| Cognitive Complaints |  |  |  |
| MFQ | 25.51 (1,99) | <.001 | .21 |
| CFQ | 50.46 (1,103) | <.001 | .33 |
| SCC | 48.76 (1,97) | <.001 | .34 |
| Personality – T score |  |  |  |
| Neuroticism | 19.09 (1,107) | <.001 | .15 |
| Extraversion | 5.65 (1,107) | .02 | .05 |
| Openness to Experience | .69 (1,107) | .41 | .01 |
| Agreeableness | .84 (1,107) | .36 | .01 |
| Conscientiousness | 10.16 (1,107) | <.01 | .09 |
| Response Bias |  |  |  |
| MMPI: Fs | 1.13 (1,106) | .29 | .01 |
| MMPI: L-r | 7.36 (1,106) | .01 | .07 |

Notes: MMSE - Mini Mental Status Examination; R-O - Rey Osterrieth; GDS - Geriatric Depression Scale; MFQ - Memory Functioning Questionnaire; CFQ - Cognitive Failures Questionnaire; SCC - subjective cognitive complaints scale; MMPI - Minnesota Multiphasic Personality Inventory; Fs - The Infrequent Somatic Responses scale; L-r - the Uncommon Virtues scale

Supplemental Table 2. Demographic, Cognitive, and Self-Reported Psychological Characteristics of Evaluation Seekers (N=20) and Matched Volunteer Subsample (N=20)

| Demographic | Evaluation Seekers  M (SD) | Matched Volunteers M (SD) | Test (Evaluation Seekers) | *p* | *d* |
| --- | --- | --- | --- | --- | --- |
| Age (years) | 69.1 (5.9) | 72.2 (6.2) | *T* = 181 | <.01 | .81 |
| Education (years) | 17.1 (2.2) | 16.6 (2.2) | t(19) = -1.87 | .08 | -.41 |
| Females, n (%) | 12 (60%) | 12 (60%) | McNemar’s test N = 20 | 1.0 |  |
| Non-white race, n (%) | 1 (5%) | 0 (0%) | McNemar’s test N = 20 | 1.0 |  |
| Neuropsychological tests | | | | | |
| MMSE | 29.1 (1.0) | 29.3 (1.0) | *T* = 65.50 | .40 | .18 |
| Modified R-O Recall | 18.8 (3.2) *N = 18* | 17.0 (3.0) | t(17) = -1.80 | .09 | -.43 |
| Trail Making Test B seconds | 66.1” (18.5”) | 77.3” (42.9”) | *T* = 127.00 | .41 | .27 |
| Digit Symbol | 50.4 (8.7) | 53.75 (10.4) | *T* = 143.50 | .15 | .30 |
| Animal fluency | 22.7 (4.9) | 22.8 (5.0) | t(19) = .06 | .95 | .01 |
| Letter fluency | 45.5 (15.6) | 48.8 (12.1) | *T* = 115.50 | .41 | .15 |
| Depression |  |  |  |  |  |
| GDS – 30 | 9.7 (6.2) *N = 19* | 3.3 (4.3) *N = 19* | *T* = 10.50 | <.01 | -.89 |
| Cognitive Complaints | | | | | |
| MFQ | 244.4 (27.8) | 297.9 (25.0) *N=17* | t(16) = 6.64 | <.001 | 1.61 |
| CFQ | 50.7 (9.4) | 30.7 (9.9)  *N = 18* | t(17) = -5.83 | <.001 | -1.38 |
| SCC | 10.6 (2.9) | 3.4 (2.7) *N = 18* | t(17) = -7.45 | <.001 | -1.76 |
| Personality – T score |  |  |  |  |  |
| Neuroticism | 50.6 (11.4) | 42.1 (8.5) | t(19) = -2.29 | .03 | -.51 |
| Extraversion | 44.4 (12.2) | 49.8 (9.1) | t(19) = 1.34 | .20 | .30 |
| Openness to Experience | 54.0 (6.7) | 55.3 (10.8) | t(19) = .49 | .63 | .11 |
| Agreeableness | 53.2 (10.5) | 53.6 (6.4) | t(19) = .18 | .86 | .04 |
| Conscientiousness | 37.4 (9.6) | 44.6 (9.5) | t(19) = 2.10 | .05 | .47 |
| Response Bias |  |  |  |  |  |
| MMPI: Fs | 1.8 (1.6) | 1.2 (.9) | t(19) = -1.58 | .13 | -.37 |
| MMPI: L-r | 2.4 (1.6) | 3.3 (2.3) | *T* = 88.50 | .29 | .29 |

Notes: MMSE - Mini Mental Status Examination; R-O - Rey Osterrieth; GDS - Geriatric Depression Scale; MFQ - Memory Functioning Questionnaire; CFQ - Cognitive Failures Questionnaire; SCC - subjective cognitive complaints scale; MMPI - Minnesota Multiphasic Personality Inventory; Fs - The Infrequent Somatic Responses scale; L-r - the Uncommon Virtues scale
